# Supplementary material for: Climatology-based regional modelling of potential vegetation and average annual long-term runoff for Mesoamerica
Source: Copernicus journal article supplement (doi:10.5194/hess-14-1801-2010), 2010-10-11
Supplement: Supplementary file 1 [file hess-14-1801-2010-supplement.pdf]

1 **Supplementary material**

2 Table 1. Model (MAPSS) parameters used in the uncertainty analysis, classified by  
 3 model process, and the minimum and maximum values used to build their uniform  
 4 probability distribution function. For conceptual parameters minimum and maximum  
 5 values were estimated as  $\pm 30\%$  from their default value (Zahele et al., 2005).

| Vegetation processes               | Parameter                                                                                             | Minimum | Maximum | Reference                                                                      |
|------------------------------------|-------------------------------------------------------------------------------------------------------|---------|---------|--------------------------------------------------------------------------------|
| Rainfall interception              | Rainfall coefficient for number of rain events (RC)                                                   | 0.7     | 1.3     | $\pm 30\%$                                                                     |
|                                    | Potential evapotranspiration (PET) threshold (mm/month) for determination of maximum number of events | 25      | 75      | $\pm 30\%$                                                                     |
|                                    | Maximum number of events at PET $\leq$ RC                                                             | 3.5     | 6.5     | $\pm 30\%$                                                                     |
|                                    | Maximum number of events at PET $>$ RC                                                                | 7       | 13      | $\pm 30\%$                                                                     |
|                                    | Maximum precipitation interception per event (mm)                                                     | 2.1     | 3.9     | $\pm 30\%$                                                                     |
| Potential Evapotranspiration (PET) | Tropical trees PET factor                                                                             | 1.785   | 3.315   | $\pm 30\%$                                                                     |
|                                    | Tropical tall grass PET factor                                                                        | 0.854   | 1.586   | $\pm 30\%$                                                                     |
| Stomatal conductance               | Full light attenuation leaf area index (LAI) for Tropical Broad/Needleleaf                            | 3.3     | 5       | Hoffmann et al., 2005                                                          |
|                                    | Tropical normal maximum stomatal conductance (mm/s)                                                   | 1.5     | 9.3     | Kelliher et al., 1995                                                          |
|                                    | Maximum conductance of Broad/Needleleaf Tropical Grass (mm/s)                                         |         |         | Kelliher et al., 1995; Schulze et al., 1994; Jarvis 1976; Emanuel et al., 2007 |
|                                    | Maximum conductance of Broad/Needleleaf Tropical Tree (mm/s)                                          | 4       | 12      | Kelliher et al., 1995; Schulze et al., 1994; Gao et al., 2000;                 |
|                                    |                                                                                                       | 2.9     | 9.3     |                                                                                |

|                                                     |                                                                                                           |       |       |                                                                    |
|-----------------------------------------------------|-----------------------------------------------------------------------------------------------------------|-------|-------|--------------------------------------------------------------------|
|                                                     | Maximum conductance of Broad/Needleleaf Tropical Shrub (mm/s)                                             | 1.5   | 7.5   | Juhrbandt et al., 2004<br>Gao et al., 2000;<br>Neilson, 1995       |
|                                                     | Minimum conductance of Broad/Needleleaf Tropical Grass (mm/s)                                             | 0     | 0.2   | Neilson, 1995;<br>Schulze et al., 2005                             |
|                                                     | Minimum conductance of Broad/Needleleaf Tropical Tree (mm/s)                                              | 0     | 1.5   | Juhrbandt et al., 2004;<br>Neilson, 1995;<br>Kelliher et al., 1995 |
|                                                     | Minimum conductance of Broad/Needleleaf Tropical Shrub (mm/s)                                             | 0     | 0.8   | Neilson, 1995;<br>Hallgren and Pitman, 2000                        |
| Actual transpiration (AT) and Leaf Area Index (LAI) | Maximum LAI:actual transpiration (AT) ratio Broad/Needleleaf Grass (LAI/mm)                               | 10.5  | 19.5  | ±30%                                                               |
|                                                     | Apply maximum LAI: actual transpiration (AT) ratio below this value of AT for Broad/Needleleaf Grass (mm) | 700   | 1300  | ±30%                                                               |
|                                                     | Maximum LAI:actual transpiration (AT) ratio for Broad/Needleleaf Tree (LAI/mm)                            | 0.175 | 0.325 | ±30%                                                               |
|                                                     | Apply maximum LAI:AT ratio below this value of AT for Broad/Needleleaf Tree (mm)                          | 700   | 1300  | ±30%                                                               |
|                                                     | Maximum LAI:actual transpiration (AT) ratio for Broad/Needleleaf Shrub (LAI/mm)                           | 7     | 13    | ±30%                                                               |
|                                                     | Apply maximum LAI:AT ratio below this value of AT for Broad/Needleleaf Shrub (mm)                         | 175   | 325   | ±30%                                                               |

|                                                                         |                                                                                                                      |        |        |                                                                                             |
|-------------------------------------------------------------------------|----------------------------------------------------------------------------------------------------------------------|--------|--------|---------------------------------------------------------------------------------------------|
| Wilting point                                                           | Wilting point for<br>Needle/Broadleaf Tropical<br>Grass (MPa)                                                        | -3     | -0.7   | Schulze et<br>al., 2005;<br>Hoffmann et<br>al., 2005;<br>Engelbrecht<br>and Kursar,<br>2003 |
|                                                                         | Wilting point for<br>Needle/Broadleaf Tropical<br>Tree (MPa)                                                         | -3     | -0.7   | Schulze et<br>al., 2005                                                                     |
|                                                                         | Wilting point for<br>Needle/Broadleaf Tropical<br>Shrub (MPa)                                                        | -6     | -0.7   | Schulze et<br>al., 2005;<br>Neilson,<br>1995                                                |
| Transpiration<br>coefficients                                           | Transpiration coefficient<br>Needle/Broadleaf Grass                                                                  | 0.07   | 0.13   | ±30%                                                                                        |
|                                                                         | Transpiration coefficient<br>Needle/Broadleaf Tree                                                                   | -0.962 | -0.518 | ±30%                                                                                        |
|                                                                         | Transpiration coefficient<br>Needle/Broadleaf Shrub                                                                  | -1.04  | -0.56  | ±30%                                                                                        |
| Actual<br>transpiration (AT)<br>rate                                    | Coefficient of model of<br>transpiration ratio for<br>Tropical Needleleaf Grass                                      | 2.975  | 5.525  | ±30%                                                                                        |
|                                                                         | Coefficient of model of<br>transpiration ratio for<br>Tropical Broadleaf Grass                                       | 2.345  | 4.355  | ±30%                                                                                        |
|                                                                         | Coefficient of model of<br>transpiration ratio for<br>Tropical Needleleaf Tree                                       | 2.45   | 4.55   | ±30%                                                                                        |
|                                                                         | Coefficient of model of<br>transpiration ratio for<br>Tropical Broadleaf Tree                                        | 2.66   | 4.94   | ±30%                                                                                        |
|                                                                         | Coefficient of model of<br>transpiration ratio for<br>Tropical Needleleaf Shrub                                      | 5.075  | 9.425  | ±30%                                                                                        |
|                                                                         | Coefficient of model of<br>transpiration ratio for<br>Tropical Broadleaf Shrub                                       | 5.075  | 9.425  | ±30%                                                                                        |
|                                                                         | Parameter controlling the<br>sensitivity of stomatal<br>conductance to PET for<br>Tropical Broad/Needleleaf<br>Grass | 0.0014 | 0.0026 | ±30%                                                                                        |
| Potential<br>Evapotranspiration<br>(PET) and<br>Stomatal<br>Conductance | Parameter controlling the<br>sensitivity of stomatal<br>conductance to PET for                                       | 0.07   | 0.13   | ±30%                                                                                        |

|                                              |                                                                                                                                  |           |           |                                       |
|----------------------------------------------|----------------------------------------------------------------------------------------------------------------------------------|-----------|-----------|---------------------------------------|
|                                              | Tropical Broad/Needleleaf Tree                                                                                                   |           |           |                                       |
|                                              | Parameter controlling the sensitivity of stomatal conductance to PET for Tropical Broad/Needleleaf Shrub                         | 0.021     | 0.039     | ±30%                                  |
| Runoff                                       | Coefficient of surface runoff                                                                                                    | 1.19      | 2.21      | ±30%                                  |
| Potential Evapotranspiration (PET) model     | Tropical Grass/Shrub/Tree measurement height for winds (m)                                                                       | 7         | 13        | ±30%                                  |
|                                              | Tropical Mid- and short grass roughness length (cm)                                                                              | 3.5       | 6.5       | ±30%                                  |
|                                              | Tropical Tree roughness length (cm)                                                                                              | 140       | 260       | ±30%                                  |
|                                              | Tropical Shrub and Tall Grass roughness length (cm)                                                                              | 7         | 13        | ±30%                                  |
| Soil water processes                         | Parameter                                                                                                                        | Min       | Max       | Reference                             |
| Soil layers thickness                        | Surface soil layer thickness (cm)                                                                                                | 500       | 2700      | Canadell et al., 1996; Neilson, 1995  |
|                                              | Intermediate soil layer thickness (cm)                                                                                           | 700       | 1300      | ±30%                                  |
|                                              | Deep soil layer thickness (cm)                                                                                                   | 1800      | 3900      | Schenk and Jackson, 2002              |
| Soil saturated water holding capacity (SWHC) | Soil saturated water holding capacity (SWHC) as percentage of volume at saturation for surface, intermediate and deep layers (%) | 42        | 52        | Saxton and Rawls, 2006; Neilson, 1995 |
| Soil field water capacity                    | Soils field water capacity (as fraction of SWHC) for surface, intermediate and deep layers                                       | 0.22      | 0.84      | Saxton and Rawls, 2006                |
| Soil Water Potential Model                   | Coefficient 1 of soil water potential model for surface, intermediate and deep layers                                            | -         | -         |                                       |
|                                              |                                                                                                                                  | 43026.788 | 79906.892 | ±30%                                  |
|                                              | Coefficient 2 of soil water                                                                                                      | 3.0513    | 5.6667    | ±30%                                  |

|                                                                                   |                                                                                                 |       |       |      |
|-----------------------------------------------------------------------------------|-------------------------------------------------------------------------------------------------|-------|-------|------|
| Percolation                                                                       | potential model for surface, intermediate and deep layers                                       |       |       |      |
|                                                                                   | Coefficient 3 of soil water potential model for surface, intermediate and deep layers           | 33.39 | 62.01 | ±30% |
|                                                                                   | Coefficient for infiltration, surface runoff and saturated percolation for surface soil layer   | 0.7   | 1.3   | ±30% |
|                                                                                   | Coefficient for infiltration and saturated percolation for intermediate soil layer              | 1.75  | 3.25  | ±30% |
|                                                                                   | Coefficient for infiltration and saturated percolation for deep soil layer                      | 7     | 13    | ±30% |
| Drainage                                                                          | Coefficient for infiltration, surface runoff and unsaturated percolation for surface soil layer | 1.75  | 3.25  | ±30% |
|                                                                                   | Coefficient for infiltration and unsaturated percolation for intermediate soil layer            | 2.1   | 3.9   | ±30% |
|                                                                                   | Coefficient for infiltration and unsaturated percolation for deep soil layer                    | 7     | 13    | ±30% |
|                                                                                   | Coefficient for infiltration, surface runoff and saturated drainage for surface soil layer      | 0.35  | 0.65  | ±30% |
|                                                                                   | Coefficient for infiltration and saturated drainage for intermediate soil layer                 | 0.56  | 1.04  | ±30% |
|                                                                                   | Coefficient for infiltration and saturated drainage for deep soil layer                         | 0.56  | 1.04  | ±30% |
|                                                                                   | Coefficient for infiltration, surface runoff and unsaturated drainage for surface soil layer    | 0.56  | 1.04  | ±30% |
| Coefficient for infiltration and unsaturated drainage for intermediate soil layer | 0.35                                                                                            | 0.65  | ±30%  |      |

Coefficient for infiltration  
and unsaturated drainage  
for deep soil layer

0.14

0.26 ±30%

---

6

## 7 **References**

- 8 Canadell, J., Jackson, R. B., Ehleringer, J. B., Mooney, H. A., Sala, O. E., and Schulze,  
9 E. D.: Maximum rooting depth of vegetation types at the global scale, *Oecologia*, 108,  
10 583-595, 1996.
- 11 Emanuel, R. E., D'Odorico, P., and Epstein, H. E.: A dynamic soil water threshold for  
12 vegetation water stress derived from stomatal conductance models, *Water Resour.*  
13 *Res.*, 43, 10.1029/2005wr004831, 2007.
- 14 Engelbrecht, B., and Kursar, T.: Comparative drought-resistance of seedlings of 28  
15 species of co-occurring tropical woody plants, *Oecologia*, 136, 383-393, 2003.
- 16 Gao, Q., Yu, M., Wang, J., Jia, H., and Wang, K.: Relationships between regional  
17 primary production and vegetation patterns, *Ecological Modelling*, 172, 1-12, 2004.
- 18 Hallgren, W. S., and Pitman, A. J.: The uncertainty in simulations by a Global Biome  
19 Model (BIOME3) to alternative parameter values, *Global Change Biology*, 6, 483-495,  
20 2000.
- 21 Hoffmann, W., da Silva, E., Machado, G., Bucci, S., Scholz, F., Goldstein, G., and  
22 Meinzer, F.: Seasonal leaf dynamics across a tree density gradient in a Brazilian  
23 savanna, *Oecologia*, 145, 306-315, 2005.
- 24 Jarvis, P. G.: The Interpretation of the Variations in Leaf Water Potential and Stomatal  
25 Conductance Found in Canopies in the Field, *Philosophical Transactions of the Royal*  
26 *Society of London. B, Biological Sciences*, 273, 593-610, 10.1098/rstb.1976.0035,  
27 1976.
- 28 Juhrendt, J., Leuschner, C., and Hölscher, D.: The relationship between maximal  
29 stomatal conductance and leaf traits in eight Southeast Asian early successional tree  
30 species, *Forest Ecology and Management*, 202, 245-256, 2004.
- 31 Kelliher, F. M., Leuning, R., Raupach, M. R., and Schulze, E. D.: Maximum  
32 conductances for evaporation from global vegetation types, *Agricultural and Forest*  
33 *Meteorology*, 73, 1-16, 1995.
- 34 Neilson, R. P.: A model for predicting continental-scale vegetation distribution and water  
35 balance, *Ecological Applications*, 5, 362–385, doi:10.2307/1942028, 1995.

36

37 Saxton, K. E., and Rawls, W. J.: Soil Water Characteristic Estimates by Texture and  
38 Organic Matter for Hydrologic Solutions, *Soil Sci Soc Am J*, 70, 1569-1578,  
39 10.2136/sssaj2005.0117, 2006.

40 Schenk, H. J., and Jackson, R. B.: Rooting depths, lateral root spreads and below-  
41 ground/above-ground allometries of plants in water-limited ecosystems, *Journal of*  
42 *Ecology*, 90, 480-494, 2002.

43 Schulze, E., Kelliher, F. M., Korner, C., Lloyd, J., and Leuning, R.: Relationships among  
44 Maximum Stomatal Conductance, Ecosystem Surface Conductance, Carbon  
45 Assimilation Rate, and Plant Nitrogen Nutrition: A Global Ecology Scaling Exercise,  
46 *Annual Review of Ecology and Systematics*, 25, 629-662,  
47 doi:10.1146/annurev.es.25.110194.003213, 1994.

48 Schulze, E-D., Beck, E., Müller-Hohenstein, K.: *Plant Ecology*, Springer, Germany,  
49 2005.

50 Zaehle, S., Sitch, S., Smith, B., and Hatterman, F.: Effects of parameter uncertainties on  
51 the modeling of terrestrial biosphere dynamics, *Global Biogeochem. Cycles*, 19,  
52 10.1029/2004gb002395, 2005.
